# Supplementary material for: Botanic Garden as a Factory of Molecules: Myrtus communis L. subsp. communis as a Case Study
Source: MDPI journal article supplement (doi:10.3390/plants11060754), 2022-03-11
Supplement: s1 [file s1]

**Table S1.** Chemical composition of the essential oils of *Myrtus communis* of different origin on the basis of literature data. From Hennia et al. [65], modified.

| Plant material       | Main compounds (relative abundances > 9.5%)                                                                                              | References |
|----------------------|------------------------------------------------------------------------------------------------------------------------------------------|------------|
| Albania              |                                                                                                                                          |            |
| Leaves I:            | $\alpha$ -Pinene (39.41), 1,8-cineole (32.31)                                                                                            | [66]       |
| II:                  | $\alpha$ -Pinene (34.1), 1,8-cineole (36.57)                                                                                             |            |
| III:                 | $\alpha$ -Pinene (43.74), 1,8-cineole (16.25), linalool (10.58)                                                                          |            |
| IV:                  | $\alpha$ -Pinene (45.54), 1,8-cineole (23.44)                                                                                            |            |
| V:                   | $\alpha$ -Pinene (18.66), 1,8-cineole (13.80), (32.98)                                                                                   |            |
| Leaves               | $\alpha$ -Pinene (19.40–20.25), limonene (12.34–16.15), 1,8-cineole (16.63–21.77), linalool (8.79–13.37), myrtenyl acetate (11.35–12.26) | [8]        |
| Flowers              | $\alpha$ -Pinene (11.47–22.50), limonene (8.65–16.15), 1,8-cineole (13.79–15.15), linalool (9.64–16.70), myrtenyl acetate (16.85–17.66)  |            |
| Fruits               | $\alpha$ -Pinene (17.23–21.46), limonene (12.63–15.07), 1,8-cineole (16.74–17.87), linalool (9.49–11.38), myrtenyl acetate (14.76–16.08) |            |
| Leaves <i>Spring</i> | $\alpha$ -Pinene (18.33–30.99), 1,8-cineole (9.71–15.45), linalool (8.76–9.5)                                                            | [8]        |
| <i>Summer</i>        | $\alpha$ -Pinene (17.9–28.45), 1,8-cineole (7.42–10.75), linalool (8.76–10.93)                                                           |            |
| Aerial parts         | 1,8-Cineole (31.19), $\alpha$ -pinene (22.95), linalool (12.14)                                                                          | [67]       |
| Leaves               | $\alpha$ -Pinene (41.55), 1,8-cineole (32.24)                                                                                            | [68]       |
| Leaves               | 1,8-Cineole (40.37), $\alpha$ -pinene (21.82)                                                                                            | [69]       |
| Berries              | 1,8-Cineole (46.48), $\alpha$ -pinene (24.52)                                                                                            |            |
| Leaves Chemotype A:  | 1,8-cineole (52.5), myrtenyl acetate (26.3), $\alpha$ -pinene (9.5)                                                                      | [70]       |
| Chemotype B:         | 1,8-cineole (52.2), $\alpha$ -pinene (29.7)                                                                                              |            |
| Chemotype C:         | 1,8 cineole (32.0), methyl eugenol (33.6)                                                                                                |            |
| Chemotype D:         | myrtenyl acetate (61.1)                                                                                                                  |            |
| Chemotype E:         | 1,8-cineole (37.4), $\alpha$ -terpinolene (20.8), $\alpha$ -terpineol (16.5)                                                             |            |
| Aerial parts         | Borneol (27.15), 1,8-cineole (21.33), $\alpha$ -pinene (11.09), camphene (9.49)                                                          | [71]       |
| Croatia              |                                                                                                                                          |            |
| Leaves               | $\alpha$ -Pinene (6.6–16.4), 1,8-cineole + limonene (12.6–29.8), linalool (10.8–18.3), myrtenyl acetate (13.5–30.7)                      | [72]       |
| Flowers              | 1,8-cineole + limonene (8.1–11.9), myrtenyl acetate (23.6–29.3)                                                                          |            |
| Fruits               | $\alpha$ -Pinene (4.0–14.4), 1,8-cineole + limonene (10.9–21.1), myrtenyl acetate (12.2–33.2)                                            |            |
| Montenegro           |                                                                                                                                          |            |
| Field-grown plants   | $\alpha$ -Pinene (21.3), 1,8-cineole (22.0), linalool (12.0), myrtenyl acetate (13.4)                                                    | [73]       |
| Leaves I             | 1,8-Cineole (13.280), linalool (22.276), myrtenyl acetate (16.561)                                                                       | [74]       |
| Leaves II            | 1,8-Cineole (16.878), linalool (18.320), myrtenyl acetate (18.009)                                                                       |            |
| Leaves III           | 1,8-Cineole (15.762), linalool (26.591), myrtenyl acetate (18.489)                                                                       |            |
| Italy                |                                                                                                                                          |            |

|                     |                                                                                                           |      |
|---------------------|-----------------------------------------------------------------------------------------------------------|------|
| Leaves I            | $\alpha$ -Pinene (19.9), 1,8-cineole (57.2)                                                               | [15] |
| Fruits I            | $\alpha$ -Pinene (47.2), 1,8-cineole (14.6)                                                               |      |
| Leaves II           | $\alpha$ -Pinene (9.5), 1,8-cineole (33.6), $\beta$ -caryophyllene (11.7)                                 |      |
| Fruits II           | $\alpha$ -Pinene (24.7), $\beta$ -elemene (17.2), $\beta$ -caryophyllene (14.4)                           |      |
| Leaves and flowers  | $\alpha$ -Pinene (15.7), 1,8-cineole (16.5), linalyl acetate (13.2)                                       | [16] |
| Leaves              | $\alpha$ -Pinene (30.0-59.5), limonene (5.2-29.8), 1,8-cineole (15.9-41.7)                                | [11] |
| Berries             | $\alpha$ -Pinene (18.2-38.9), limonene (5.0-44.5), 1,8-cineole (5.8-24.8)                                 |      |
| Leaves              | $\alpha$ -Pinene (9.5-26.8), linalool (9.8-28.9), 1,8-cineole (10.9-26.6), $\alpha$ -terpineol (3.8-22.9) | [12] |
| Flowers             | $\alpha$ -Pinene (9.9-11.1), linalool (6.8-15.9), 1,8-cineole (4.5-29.1), $\alpha$ -terpineol (7.7-18.3)  |      |
| Leaves              | $\alpha$ -Pinene (10.5-57.9), linalool (3.7-38.4), 1,8-cineole (7.7-33.3)                                 | [18] |
| Leaves              | $\alpha$ -Pinene (9.4-48.5), linalool (2.3-29.6), 1,8-cineole (4.5-18.9)                                  | [17] |
| <b>Portugal</b>     |                                                                                                           |      |
| Leaves              | $\alpha$ -Pinene (43.5–43.7), limonene (15.0–15.5), 1,8-cineole (22.9–25.3)                               | [75] |
| Leaves              | $\alpha$ -Pinene (10.38–21.5), limonene+1,8-cineole (20.03–39.45), myrtenyl acetate (7.40–37.62)          | [76] |
| Aerial parts        | 1,8-Cineole (36.7), $\alpha$ -pinene (17.3), myrtenyl acetate (17.1), limonene (9.8)                      | [77] |
| <b>Chipre</b>       |                                                                                                           |      |
| Leaves              | 1,8-Cineole (50.12), linalool (12.65)                                                                     | [78] |
| <b>Turkey</b>       |                                                                                                           |      |
| Leaves              | 1,8-Cineole (18.2), linalool (16.3), myrtenyl acetate (14.5)                                              | [79] |
| Leaves and branches | 1,8-Cineole (10.5), linalool (18.6), myrtenyl acetate (10.8)                                              | [80] |
| Leaves and flowers  | 1,8-Cineole (37.03), $\alpha$ -pinene (30.17)                                                             |      |
| Leaves              | Linalool (31.3), linalyl acetate (17.8), 1,8-cineole (14.7) (57,68)                                       | [81] |
| Leaves              | 1,8-Cineole (37), $\alpha$ -pinene (30.2), linalool (9.7)                                                 |      |
| Leaves              | $\alpha$ -Pinene (29.4), limonene (23.5), 1,8-cineole (20.1), linalool (10.4)                             | [82] |
| Fruits              | 1,8-Cineole (29.20), linalool (15.67), $\alpha$ -terpineol (18.43)                                        | [83] |
| Leaves              | 1,8-Cineole (49.15), myrtenol (19.49)                                                                     | [84] |
| <b>Egypt</b>        |                                                                                                           |      |
| Leaves              | 1,8-Cineole (27.2), $\alpha$ -pinene (25.5), linalool (11.8)                                              | [85] |
| Fruits              | 1,8-Cineole (29.6), menthyl acetate (13.4), <i>trans</i> -caryophyllene (10.5)                            | [86] |
| Leaves              | $\alpha$ -Pinene (26.16), 1,8-cineole (16.45), linalool (11.23)                                           |      |
| Leaves              | $\alpha$ -Pinene (26.16), 1,8-cineole (16.45), linalool (11.23)                                           | [87] |
| Leaves              | $\alpha$ -Pinene (18.0), limonene (21.8), linalyl acetate (31.4)                                          | [88] |
| Leaves              | $\alpha$ -Pinene (10.1–11.6), 1,8-cineole (12.7–19.6), linalool (7.0–15.8), myrtenyl acetate (23.7–39.0)  | [89] |

|                                                       |                                                                                                                                                           |       |
|-------------------------------------------------------|-----------------------------------------------------------------------------------------------------------------------------------------------------------|-------|
| Leaves of cultivated plants during the fruiting stage | limonene (14.5), linalool (15.6), myrtenyl acetate (24.4)                                                                                                 | [90]  |
| Leaves of the wild plants, during the flowering stage | Myrtenyl acetate (31.8), $\alpha$ -pinene (29.8), 1,8-cineole (10.3)                                                                                      | [91]  |
| Aerial parts                                          | $\alpha$ -pinene (16.0), 1,8-cineole (11.4), linalool (13.7), myrtenyl acetate (19.7)                                                                     | [90]  |
| <b>Algeria</b>                                        |                                                                                                                                                           |       |
| Leaves                                                | 1,8-Cineole (46.98), cis-geraniol (25.18)                                                                                                                 | [92]  |
| Leaves                                                | Hydrodistillation: $\alpha$ -Pinene (44.62), 1,8-cineole (25.46) (33)<br>Solvent-free-microwave-extraction: $\alpha$ -Pinene (30.65), 1,8-cineole (32.12) | [9]   |
| Leaves                                                | $\alpha$ -Pinene (46.9), 1,8-cineole (25.2)                                                                                                               | [93]  |
| Berries                                               | 1,8-Cineole (11.4), linalool (36.2), estragole (18.4)                                                                                                     |       |
| Leaves                                                | $\alpha$ -Pinene (32.8–48.4), limonene (6.0–23.9), 1,8-cineole (6.5–30.4)                                                                                 | [9]   |
| Leaves                                                | $\alpha$ -Pinene (39.3), 1,8-cineole (33.3)                                                                                                               | [94]  |
| Twigs                                                 | $\alpha$ -Pinene (10.8), 1,8-cineole (13.5)                                                                                                               |       |
| Leaves                                                | 1,8-Cineole (26.2), $\alpha$ -Pinene (18.96), limonene (11.12)                                                                                            | [95]  |
| Leaves and flowers                                    | Collective sample I: $\alpha$ -Pinene (50.8), 1,8-cineole (21.9)                                                                                          | [96]  |
|                                                       | Collective sample II: $\alpha$ -Pinene (33.6), 1,8-cineole (13.3), linalool (14.8), linalyl acetate (9.5)                                                 |       |
| Leaves                                                | Limonene (23.4), linalool (15.4), $\alpha$ -pinene (10.7), geranyl acetate (10.9)                                                                         | [97]  |
| Berries                                               | Limonene (12.93), octadienol (12.85), $\alpha$ -pinene (10.01)                                                                                            | [98]  |
| Leaves                                                | $\alpha$ -Pinene (22.8–38.7), 1,8-cineole (10.3–24.2), limonene (11.0–18.7), linalool (1.8–32.0)                                                          | [99]  |
| Fruits                                                | $\alpha$ -Pinene (21.1–43.4), 1,8-cineole (5.2–31.3), limonene (11.0–18.7)                                                                                |       |
| <b>Tunisia</b>                                        |                                                                                                                                                           |       |
| Leaves                                                | 1,8-Cineole (61.0), $\alpha$ -pinene (23.7)                                                                                                               | [100] |
| Leaves                                                | $\alpha$ -Pinene (45.9–52.29), 1,8-cineole (19.0–23.1), limonene (9.0–9.7)                                                                                | [101] |
| Leaves                                                | $\alpha$ -Pinene (8.63–26.73), 1,8-cineole (25.62), linalool (3.91–11.18), linalyl acetate (0.99–12.96), $\alpha$ -terpineol (1.96–28.44)                 | [102] |
| Fruits                                                | $\alpha$ -Pinene (1.24–12.64), 1,8-cineole (7.31–40.99), geranyl acetate (1.83–20.54), $\beta$ -caryophyllene (0.85–10.83)                                | [103] |
| Leaves                                                | $\alpha$ -Pinene (58.05), 1,8-cineole (21.67)                                                                                                             | [23]  |
| Flowers                                               | $\alpha$ -Pinene (17.53), 1,8-cineole (12.70), limonene (10.11), eugenol (10.11)                                                                          |       |
| Stems                                                 | 1,8-Cineole (32.84), $\alpha$ -pinene (10.53), (E)- $\beta$ -ocimene (9.48)                                                                               |       |
| Leaves                                                | $\alpha$ -Pinene (16.72–30.70), 1,8-cineole (20.12–30.64), linalool (10.44–11.80), myrtenyl acetate (0.14–20.18)                                          | [104] |
| Leaves                                                | $\alpha$ -Pinene (21.6–39.4), limonene (0.1–18.8), 1,8-cineole (12.5–26.3), linalool (4.6–20.0)                                                           | [105] |
| Fruits                                                | 1,8-Cineole (23.7), linalool (15.3)                                                                                                                       |       |

|                               |                                                                                                                                                  |       |
|-------------------------------|--------------------------------------------------------------------------------------------------------------------------------------------------|-------|
| Floral buds                   | $\alpha$ -Pinene (48.9), 1,8-cineole (15.3)                                                                                                      | [23]  |
| Leaves                        | $\alpha$ -Pinene (52.2), 1,8-cineole (21.9)                                                                                                      | [106] |
| Fruits                        | $\alpha$ -Pinene (1.73–10.36), 1,8-cineole (13.27–25.95), linalool (12.79–15.55), $\alpha$ -terpineol (5.42–12.51), geranyl acetate (5.08–10.21) | [107] |
| Leaves                        | $\alpha$ -Pinene (15.59), limonene (8.94), 1,8-cineole (16.55), linalool (13.30), myrtenyl acetate (20.75)                                       | [108] |
| Leaves                        | $\alpha$ -Pinene (35.60), 1,8-cineole (29.60)                                                                                                    | [109] |
| Leaves                        | $\alpha$ -Pinene (55.66), 1,8-cineole (30.05)                                                                                                    | [110] |
| Leaves                        | $\alpha$ -Pinene (44.1), 1,8-cineole (36.0)                                                                                                      | [111] |
| <b>Morocco</b>                |                                                                                                                                                  |       |
| Not reported                  | 1,8-Cineole (74.5), $\alpha$ -pinene (9.5)                                                                                                       | [112] |
| Leaves                        | 1,8-Cineole (43.03), myrtenyl acetate (25.05), $\alpha$ -pinene (10.00)                                                                          | [113] |
| Leaves and flowers            | 1,8-Cineole + limonene (40.9), $\alpha$ -pinene (21.8), myrtenyl acetate (19.8)                                                                  | [114] |
| Leaves                        | Myrtenyl acetate (49.27), 1,8-cineole (26.93), $\alpha$ -pinene (16.52)                                                                          | [115] |
| Aerial parts                  | $\alpha$ -Pinene (10.0), 1,8-cineole (43.1), myrtenyl acetate (25.0)                                                                             | [116] |
| Leaves                        | $\alpha$ -Pinene (5.7–25.7), limonene (9.5–11.4), 1,8-cineole (29.7–32.4), myrtenyl acetate (14.9–33.0)                                          | [76]  |
| <b>Iran</b>                   |                                                                                                                                                  |       |
| Not reported                  | $\alpha$ -Pinene (29.1), limonene (21.5), 1,8-cineole (17.9), linalool (10.4)                                                                    | [117] |
| Aerial parts                  | Limonene (38.2), $\alpha$ -pinene (31.5)                                                                                                         | [118] |
| Not reported                  | $\alpha$ -Pinene (29.4), limonene (21.2), 1,8-cineole (18.0)                                                                                     | [119] |
| Leaves                        | 1,8-Cineole (36.1), $\alpha$ -pinene (22.5), linalool (8.4)                                                                                      | [30]  |
| Not reported                  | $\alpha$ -Pinene (29.4), limonene (21.2), 1,8-cineole (18.0), linalool (10.66)                                                                   | [120] |
| Leaves at the flowering stage | $\alpha$ -Pinene (3.8–23.0), 1,8-cineole (9.9–20.3), limonene (5.5–17.8), linalool (12.3–17.6)                                                   | [121] |
| Ripe fruits                   | 1,8-Cineole (24.0), $\alpha$ -pinene (22.1), limonene (17.6), linalool (11.4) (155)                                                              |       |
| Leaves                        | $\alpha$ -Pinene (29.9–38.6), limonene (13.5–18.1), 1,8-cineole (23.3–29.1)                                                                      | [122] |
| Leaves                        | $\alpha$ -Pinene, 1,8-cineole, myrtenyl acetate                                                                                                  | [30]  |
| Leaves and flowers            | $\alpha$ -Pinene (47.8), 1,8-cineole (25.9)                                                                                                      | [124] |
| Leaves                        | $\alpha$ -Pinene (38.71–56.3), limonene (12.01–38.0), 1,8-cineole (0–18.92), linalool (2.82–11.5)                                                | [125] |
| Leaves                        | $\alpha$ -Pinene (16.62–47.83), limonene (0–24.4), 1,8-cineole (9.56–28.94), linalool (9.17–15.76)                                               | [126] |
| Leaves                        | $\alpha$ -Pinene (39.2), 1,8-cineole (22.0), linalool (18.4)                                                                                     | [127] |
| Leaves                        | $\alpha$ -Pinene (24.42–31.57), limonene (tr-23.41), 1,8-cineole (5.92–21.21), linalool (8.72–11.56)                                             | [128] |
| Leaves                        | $\alpha$ -Pinene (22.3–38.8), limonene (tr-21.4), 1,8-cineole (8.7–43.8), linalool (6.4–14.5)                                                    | [129] |
| Leaves and flowers            | $\alpha$ -Pinene (23.0), 1,8-cineole (20.3), limonene (17.8), linalool (12.3)                                                                    | [130] |
| Leaves                        | $\alpha$ -Pinene (24.4–30.8), limonene (31.4–44.8), 1,8-cineole (11.2–22.3)                                                                      | [131] |
| Leaves                        | $\alpha$ -Pinene (17.5–37.1), 1,8-cineole (9.9–29.8), linalool (7.0–23.1), linalyl acetate (2.3–10.5)                                            | [132] |

|                        |                                                                                |       |
|------------------------|--------------------------------------------------------------------------------|-------|
| Leaves                 | $\alpha$ -Pinene (7.04–31.29), limonene (14.02–22.52), linalool (1.72–15.47)   | [133] |
| Leaves or aerial parts | $\alpha$ -Pinene (27.24–52.39), 1,8-cineole (24.79–37.99)                      | [134] |
| Leaves                 | $\alpha$ -Pinene (27.87), 1,8-cineole (20.15), linalool (10.26)                |       |
| Leaves                 | $\alpha$ -Pinene (22.02), 1,8-cineole (26.91), linalool (12.74)                | [135] |
| Shoots                 | $\alpha$ -Pinene (32.5), 1,8-cineole (24.15), limonene (15.5), linalool (10.6) | [136] |
| <b>Saudi Arabia</b>    |                                                                                |       |
| Aerial parts           | $\alpha$ -Pinene (11.6), 1,8-cineole (26.5), linalool (18.0)                   | [137] |
| <b>Yemen</b>           |                                                                                |       |
| Leaves                 | Linalool (29.1), 1,8-cineole (18.4), $\alpha$ -terpineol (10.8)                | [138] |
